# Supplementary material
Source: publisher figshare collection journal article supplement (https://acs.figshare.com/ndownloader/files/31722187)
Supplement: Supplementary file 1 [file 31722187]

## Supporting Information

### **Molecular diagnostic system using engineered fusion protein conjugated magnetic nanoparticles**

Juyoung Kang<sup>a,#</sup>, Donguk Kang<sup>b,#</sup>, Gyuho Yeom<sup>a,\*</sup>, and Chin-Ju Park<sup>b,\*</sup>

<sup>a</sup> SB BIOSCIENCE Co., Ltd, Daejeon, 34141, South Korea

<sup>b</sup> Department of Chemistry, Gwangju Institute of Science and Technology, Gwangju, 61005, South Korea

<sup>#</sup> These authors contributed equally to this work

<sup>\*</sup> Corresponding author.

Gyuho Yeom: Tel: +82-42-710-5533; Fax: +82-070-7543-6557; E-mail address: sbb.ygh@gmail.com

Chin-Ju Park: Tel: +82-62-715-3630; Fax: +82-62-715-2866; E-mail address: cjpark@gist.ac.kr

## Contents

|                                                                                                                    |    |
|--------------------------------------------------------------------------------------------------------------------|----|
| 1. Purification and identification of MagR-MazE fusion protein (Figure S1) .....                                   | S3 |
| 2. Sequence of the randomly generated dsDNA (Figure S2).....                                                       | S4 |
| 3. Detection of the short-length PCR amplicons on the proposed lateral flow assay (LFA) platform (Figure S3) ..... | S5 |
| 4. Detection of the PCR products of 2019-nCoV-N-Positive control gene (Figure S4).....                             | S6 |

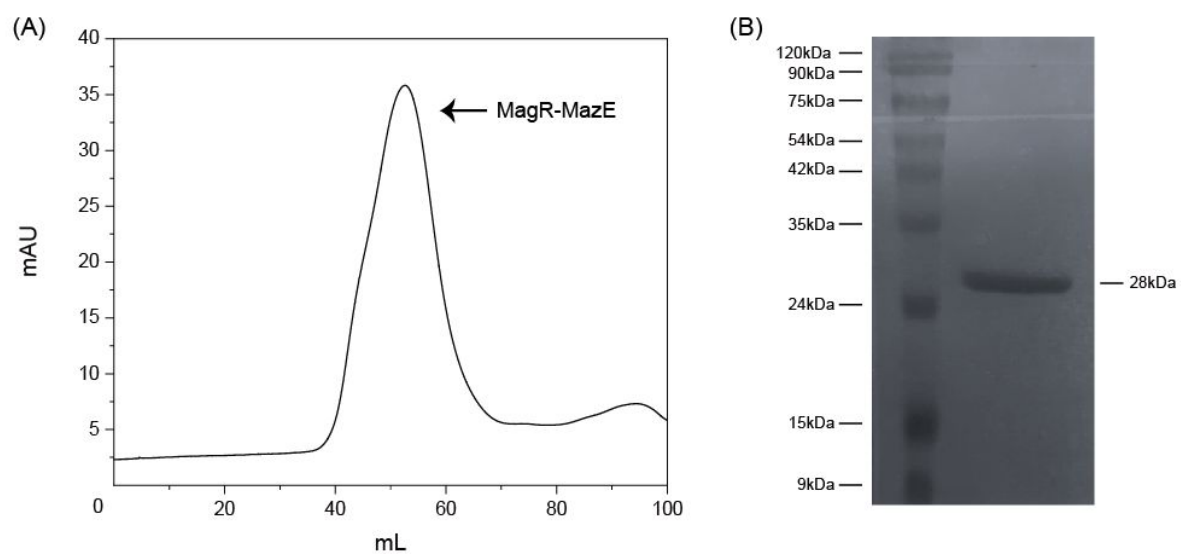

**Figure S1.** (A) Purification of MagR-MazE fusion protein using fast protein liquid chromatography, and (B) identification of the protein through SDS PAGE.

```

┌ ATGTCGGGAC GTAATGTGGA ATCCCATATG GAACGTAATG AGAAGGTCGT 50 ┘
AGTCAATAAT TCGGGGCACG CAGAT75GTAA AAAACAACAA CAGCAGGTCG 100 ┘
AACACACTGA GTTTACACAC ACGGAAGTTA AGGCGCCCTT GATTCATCCT 150 ┘
GCACCGCCTA TTATCAGTAC GGGGGCAGCC GGGCTTGCCG AGGAGATCGT 200
TGGTCAAGGT TTCACTGCTA GCGCCGCTCG TATTTCAGGC GGGACAGCTG 250
AAGTACACCT GCAGCCTTCC GCGGCGATGA CGGAGGAAGC GCGTCGTGAT 300 ┘
CAGGAACGCT ACCGTCAGGA ACAGGAAAGC ATTGCCAAGC AGCAAGAGCG 350
CGAGATGGAG AAGAAAACCG AGGCCTACCG TAAAACCGCT GAGGCTGAAG 400
CTGAGAAGAT CCGCAAGGAG TTGGAGAAAC AGCACGCACG CGATGTCGAA 450
TTTCGCAAAG ACCTTATTGA AAGTACGATT GATCGTCAGA AACGTGAAGT 500 ┘

```

**Figure S2.** The sequence of the randomly generated dsDNA which used in PCR experiments by lengths: 50 bp, 75 bp, 100 bp, 150 bp, 300bp, and 500 bp.

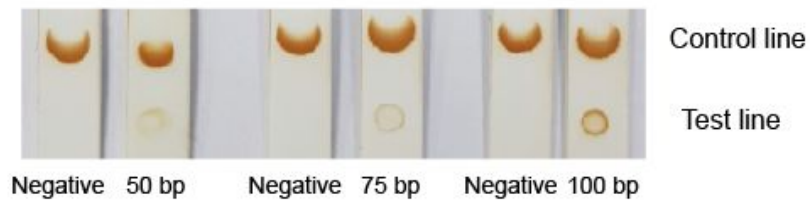

**Figure S3.** Detection of the short-length PCR amplicons on the proposed lateral flow assay (LFA) platform. Comparison of signal intensity of 5 nm of the amplified dsDNA by length: 50 bp, 75 bp, and 100 bp. Negative sample (PCR was performed without template gene for negative sample) were also tested.

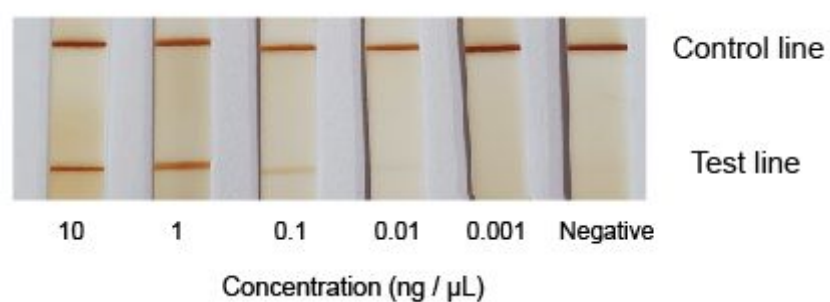

**Figure S4.** Detection of the PCR products of 2019-nCoV-N-Positive control gene. Diverse concentration of the PCR products: 0.001, 0.01, 0.1, 1, 10 ng /  $\mu$ L, and negative sample (PCR was performed without 2019-nCoV-N-Positive control gene for negative sample) were tested.
